# Supplementary material for: Altered Expression of Vitamin D Metabolism Genes and Circulating MicroRNAs in PBMCs of Patients with Type 1 Diabetes: Their Association with Vitamin D Status and Ongoing Islet Autoimmunity
Source: Preprints.org preprint supplement (doi:10.20944/preprints202309.0318.v2), 2023-10-09

**Figure S1**. miRNAs predication for CYP24A1 and CYP27B1 using Target scan and miRTarBase

**CYP24A1**

**miRTarBase**

**
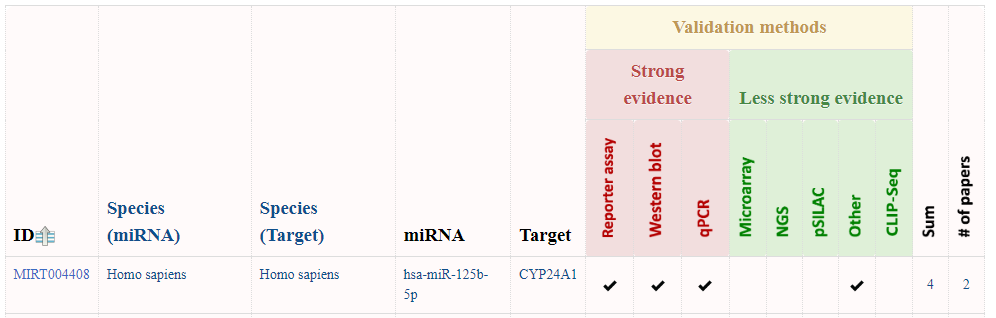
**

**Target scan**

**
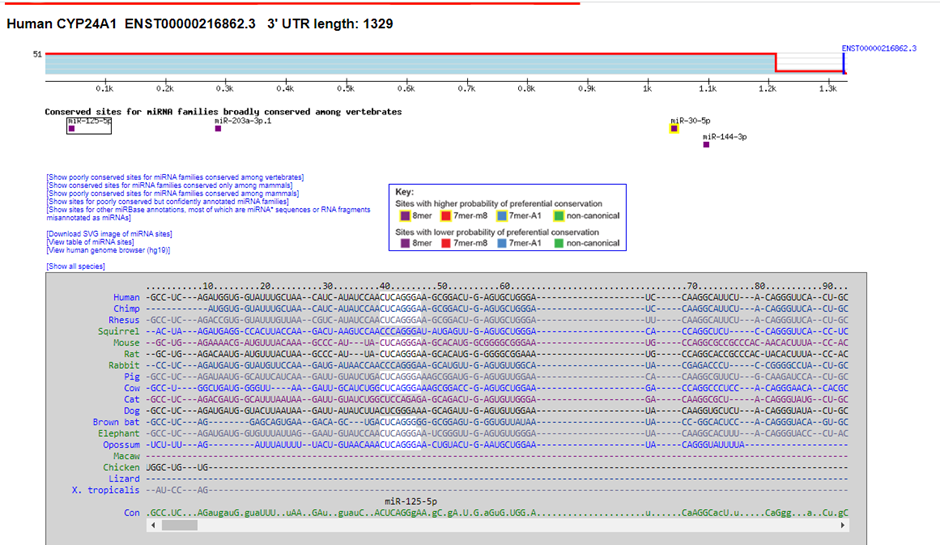
**

**
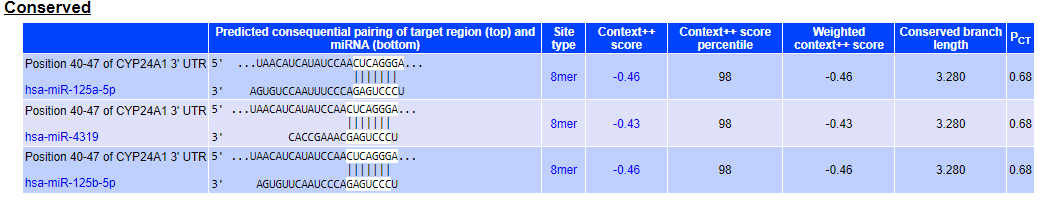
**

**CYP27B1**

**
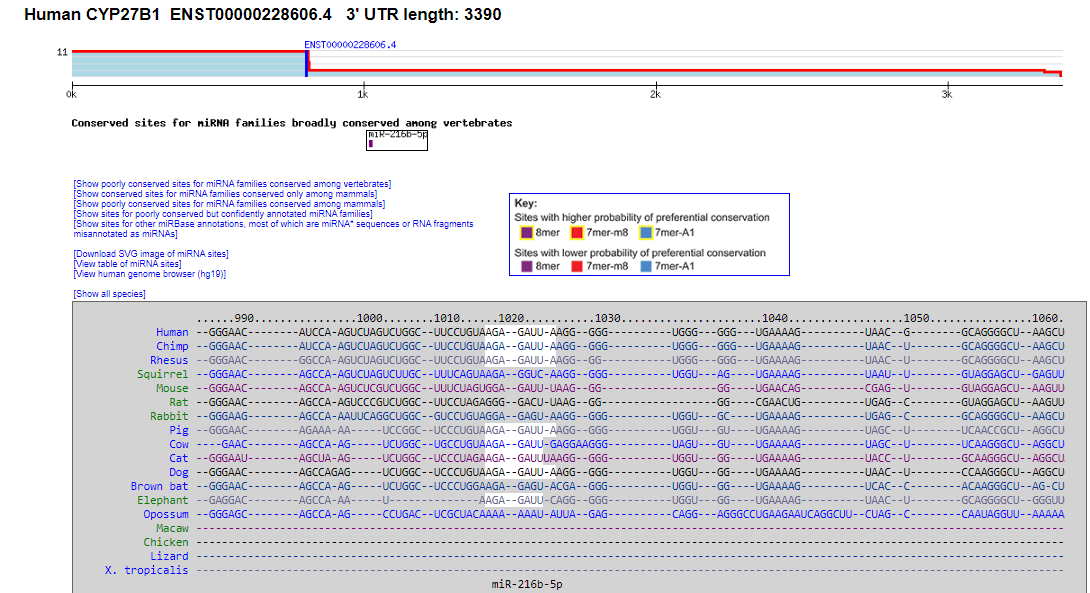
**


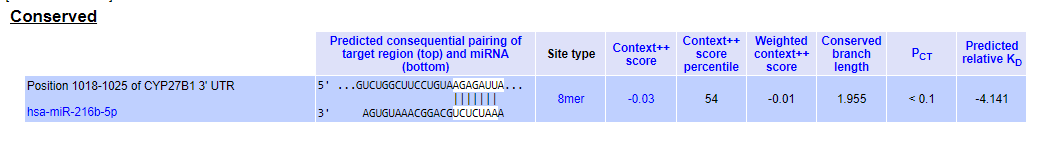

Supplement: Supplementary file 1 [file supplementary]
